# Supplementary material for: Single-cell transcriptomic analysis of zebrafish cranial neural crest reveals spatiotemporal regulation of lineage decisions during development
Source: Cell Rep. Author manuscript; Available in PMC 2022 Jan 7. (PMC8741273; doi:10.1016/j.celrep.2021.110140)
Supplement: 1 [file NIHMS1766435-supplement-1.pdf]

**Cell Reports, Volume 37**

**Supplemental information**

**Single-cell transcriptomic analysis of zebrafish  
cranial neural crest reveals spatiotemporal  
regulation of lineage decisions during development**

**David Tatarakis, Zixuan Cang, Xiaojun Wu, Praveer P. Sharma, Matthew Karikomi, Adam L. MacLean, Qing Nie, and Thomas F. Schilling**

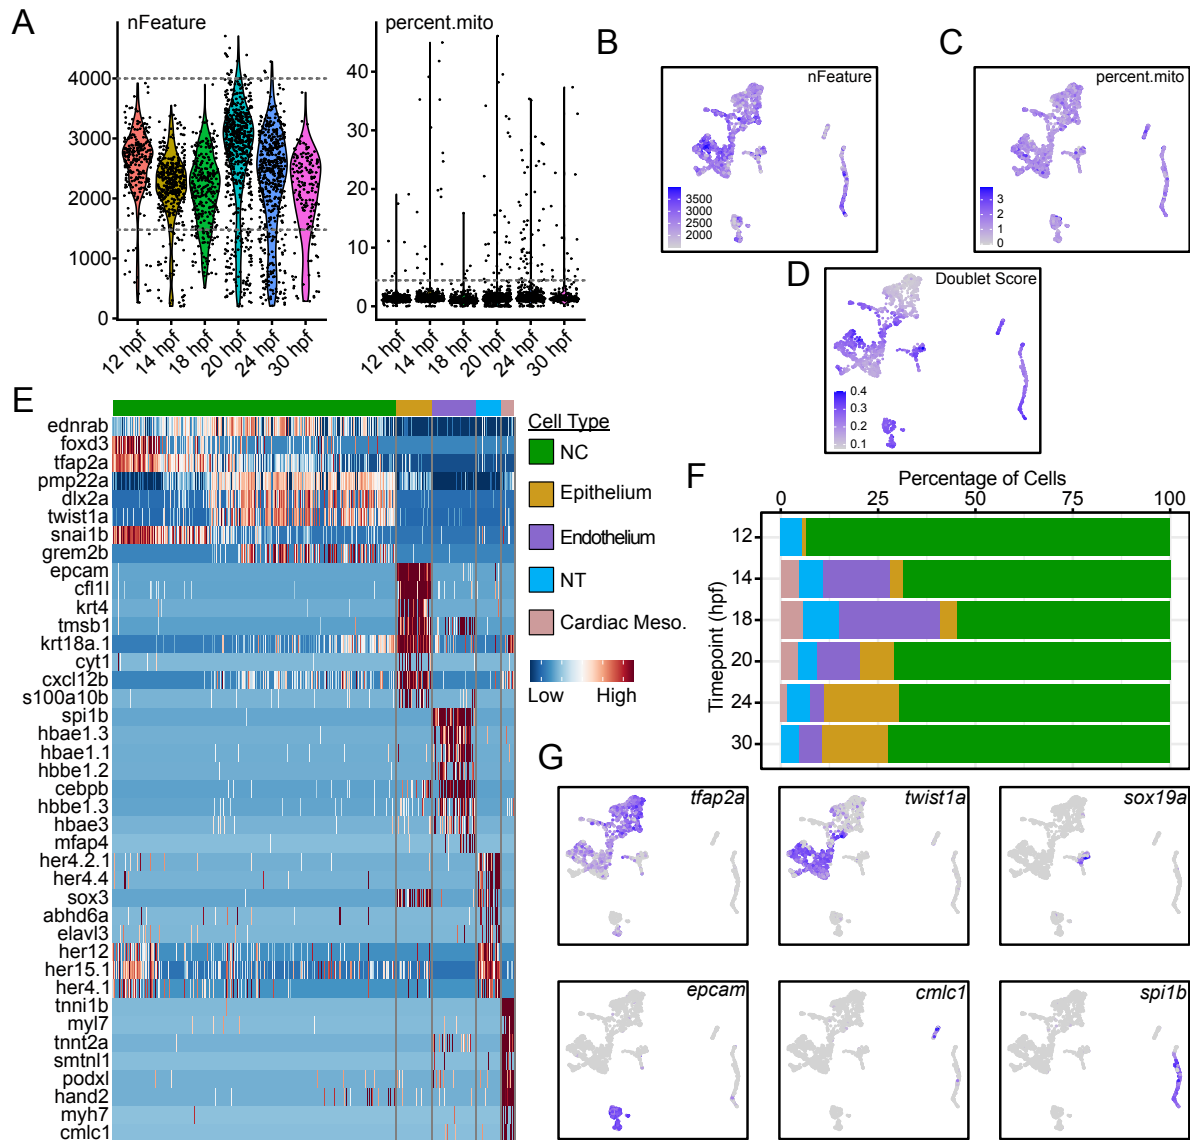

**Figure S1: Expression profiles of non-NC cell types, Related to Figure 1.** **A)** Violin plots showing QC metrics for whole arch single-cell object. Cells were excluded with >4000 features or <1500 features detected (dashed lines). Cells were excluded with >4% of reads mapped to mitochondrial genes (dashed line). **B)** Feature plot showing *nFeature* per cell in filtered whole arch object. **C)** Feature plot showing percent mitochondrial reads per cell in filtered whole arch object. **D)** Feature plot showing Doublet detection scores generating using DoubletFinder. **E)** Heatmap showing top marker genes in each cell type in Fig. 1C. **F)** Stacked barplots showing the number of each cell type recovered in each time point. **G)** Feature plots showing expression of strong marker genes for each cell type overlaid with UMAP.

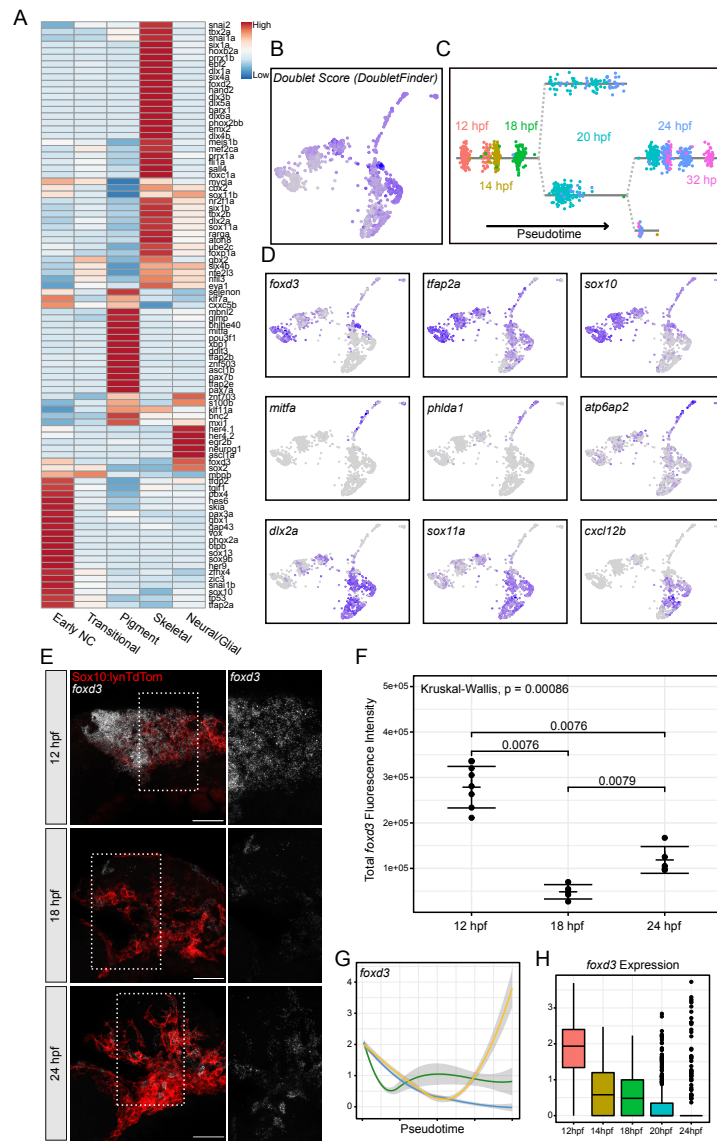

**Figure S2: Marker gene profiles of NC lineages and in vivo temporal expression patterns of *foxd3*, Related to Figure 3.** **A)** Heatmap showing average expression of top lineage markers in each NC subtype. **B)** Doublet detection scores generating using DoubletFinder overlaid with ForceAtlas (FA) Embedding. **C)** Dendrogram with cells ordered according to pseudotime and colored according to real developmental time point identity. **D)** Feature plots showing relative expression (dark purple indicates high levels) of lineage markers overlaid with FA embedding. **E)** Confocal micrographs of isHCR for *foxd3* expression (white) at 12, 18, and 24 hpf in *tg(sox10:lynTdTomato)* embryos where NC plasma membranes are marked by tdTomato (red). Enlarged region is the PA1 migratory stream. **F)** Quantification of *foxd3* expression from isHCR images in PA1 using corrected total fluorescence intensity (Y axis) at 12 hpf (n = 7 embryos, mean = 278640), 18 hpf (n = 5 embryos, mean = 48478), and 24 hpf (n = 5 embryos, mean = 118584). Dots represent means in individual embryos; lines represent means within conditions. Error bars represent mean  $\pm$  SD. **G)** Local regression graph for *foxd3* expression levels (Y axis) in pigment (green), glial (yellow) and skeletal (blue) progenitors across pseudotime (X axis). Lines indicate moving averages for each branch. **H)** Barplots showing expression levels of *foxd3* (Y axis) across developmental time points (X axis). Lines indicate means, boxes indicate IQR, whiskers indicate IQR\*1.5, points indicate outliers. For micrographs, Scale bars = 50 $\mu$ m.

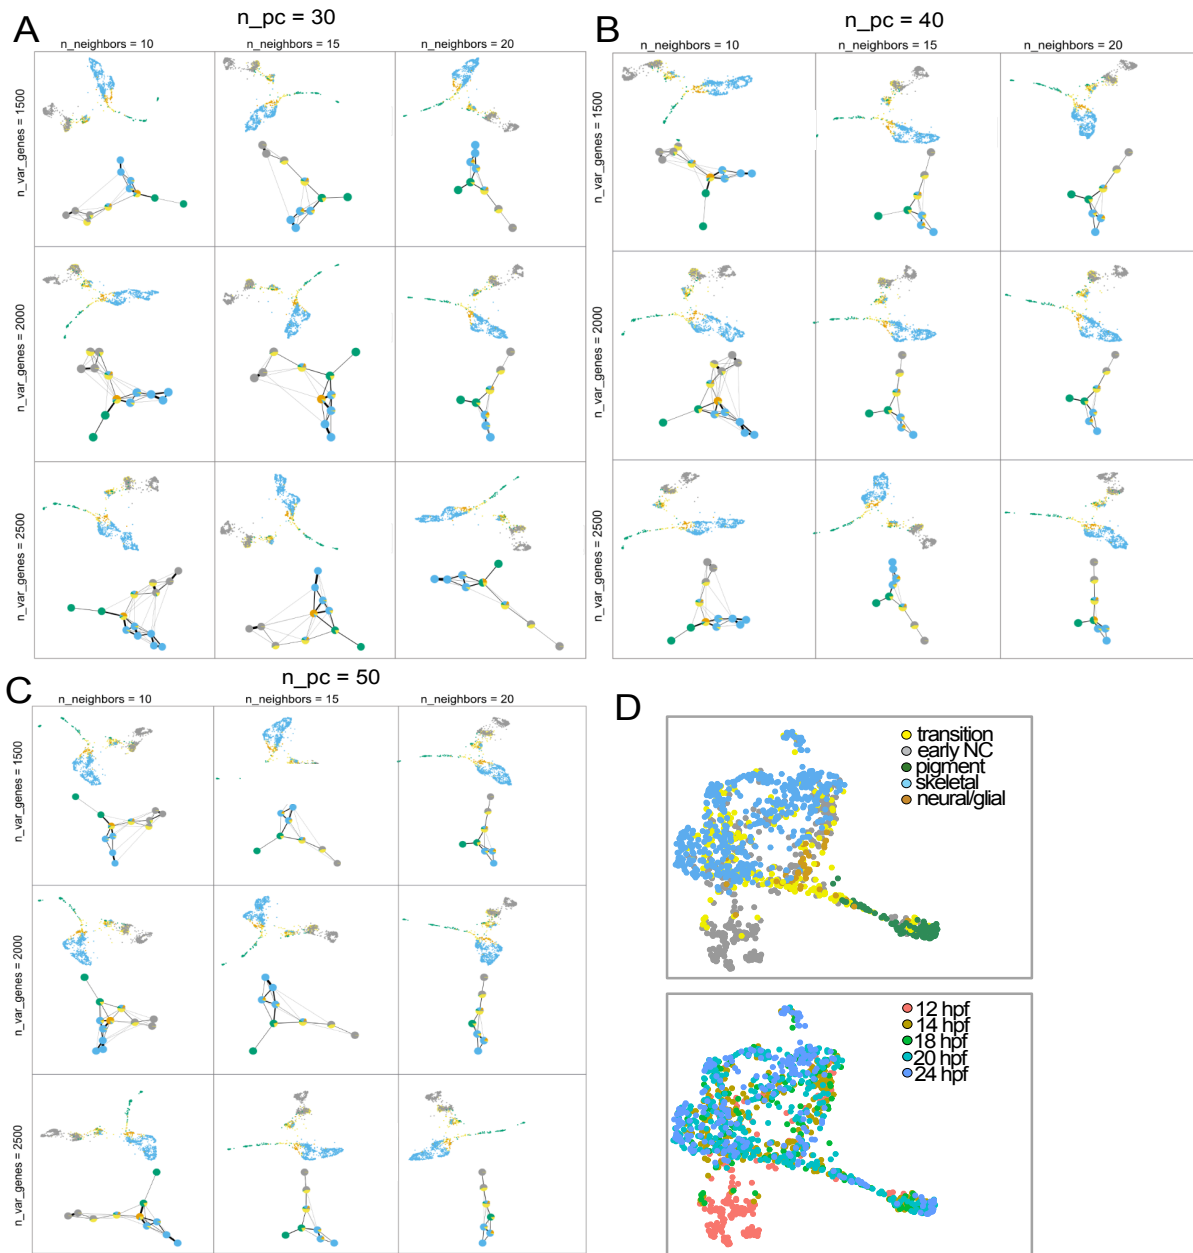

**Figure S3: Temporal NC trajectories inferred from scRNA-seq are robust, Related to Figure 3. A-C)** Temporal trajectories and the coarse graph of cell type compositions obtained using different parameter combinations. Number of principal components ( $n_{pc}$ ), number of neighbors ( $n_{neighbors}$ ), and number of variable genes ( $n_{var\_genes}$ ). Colors match lineage colors in Fig S3D. **D)** UMAPs showing integration by CCA of each library to remove timepoint-specific gene expression differences.

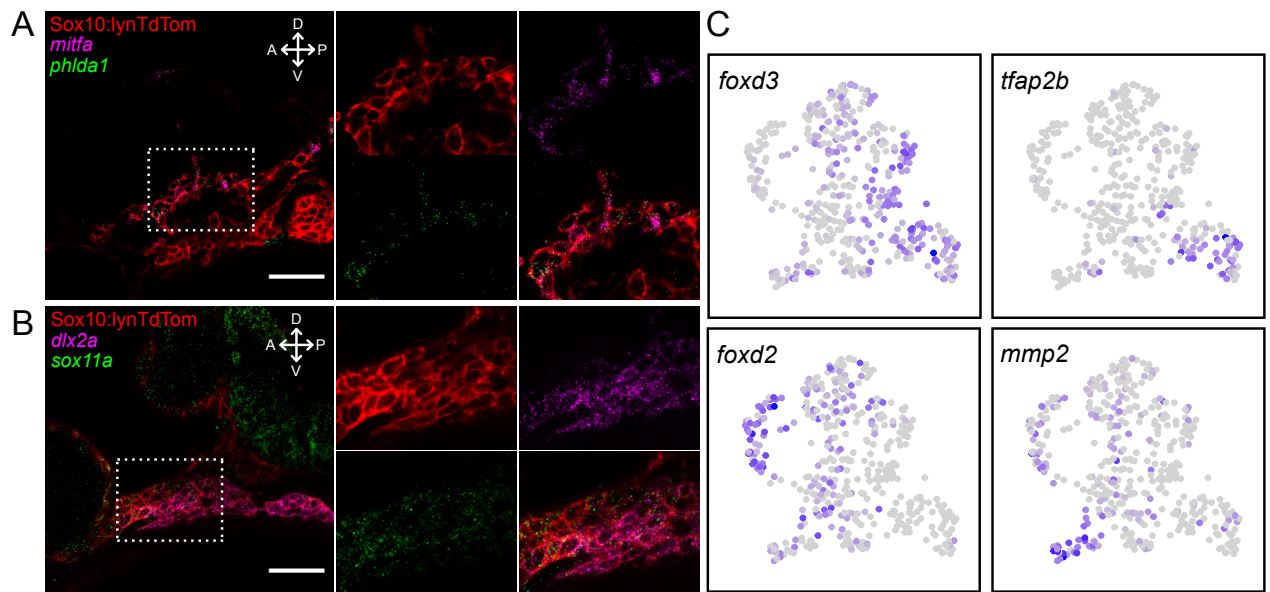

**Figure S4: Additional marker gene analysis of skeletal and pigment lineages at 24 hpf in vivo and at 18 hpf in silico, Related to Figure 4.** Confocal micrographs of isHCRs co-labeled for **A)** *phlda1* (green) and **B)** *mitfa* (magenta) in putative pigment progenitors (upper panels) and *sox11a* (green) and *dlx2a* (magenta) in putative skeletal progenitors (lower panels) at 24 hpf in *tg(sox10:lynTdTomato)* embryos where NC plasma membranes are marked by tdTomato (red). **C)** Feature plots showing expression of 4 marker genes in 18 hpf neural crest.

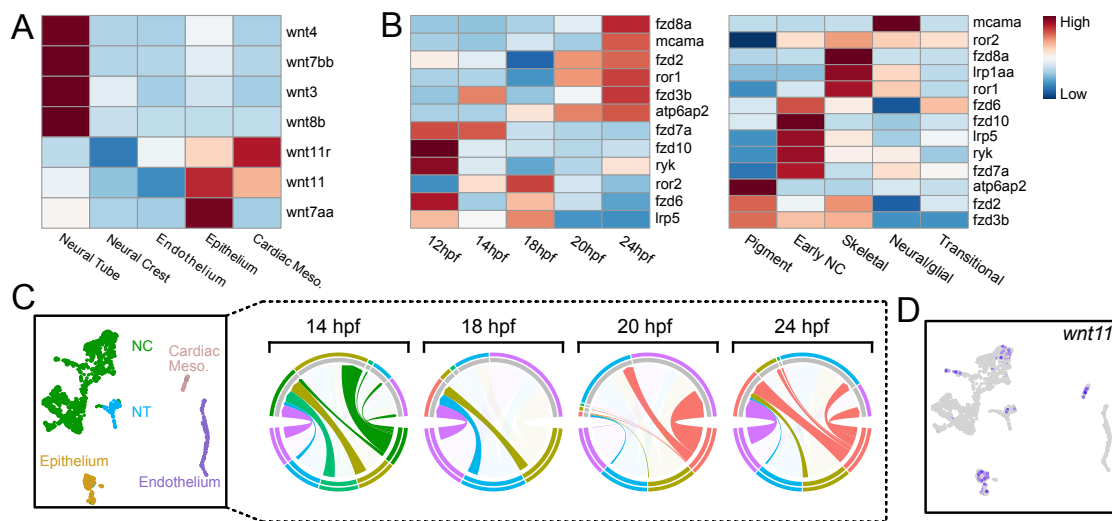

**Figure S5: Cell-cell signaling analysis suggests changes in source of Wnt signaling across development in the NC, Related to Figure 6. A)** Heatmap showing average expression of Wnt ligands in each cell type in the single cell timeline. **B)** Heatmaps showing average expression of Wnt receptors in NC cells both at different timepoints and in different lineages. **C)** Signaling analysis for cell-cell communication between NC cells and other cell types through SoptSC, color code corresponding to Fig. 1C. The bottom half of each circos plot represents signal-sending clusters; the top half represents signal-receiving clusters. Arrows are colored according to signal-sending cell type. Width of arrows indicates probability of a signaling event between the two cell types. **D)** Feature plot showing expression of *wnt11* in all cell types except endothelial, with NC expression confined mostly to early NC cells and pigment cells.

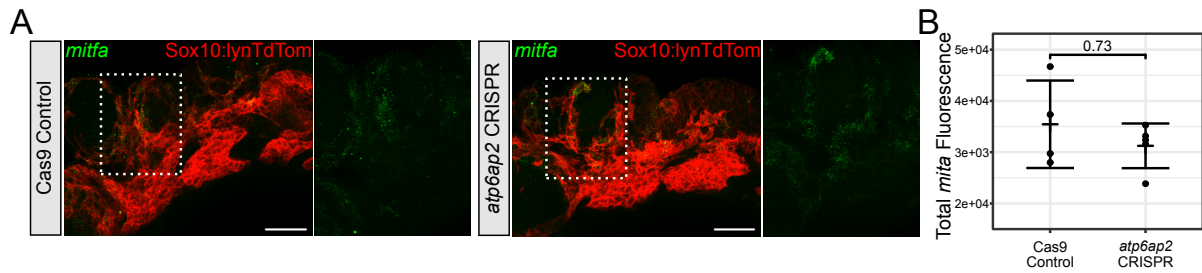

**Figure S6: isHCR of *mitfa* reveals pigment progenitors are specified in *atp6ap6* crispants, Related to Figure 6. **A)** Confocal micrographs of isHCR showing *mitfa* expression (green) at 24 hpf in a Cas9-injected control (left panel) and *atp6ap2* CRISPR-injected embryo (right panel) in *tg(sox10:lynTdTomato)* transgenics where NC plasma membranes are marked by tdTomato (red). **B)** Quantification of *mitfa* expression using corrected total fluorescence intensity between control embryos (n = 4 embryos, mean = 35447) and *atp6ap2* CRISPR embryos (n = 5 embryos, mean = 31242). Wilcoxon p-value = 0.73. Dots represent means in individual embryos. Lines represent means within conditions. Error bars represent means  $\pm$ SD. For micrographs, Scale bars = 50 $\mu$ m.**
